# Supplementary material for: Sevoflurane inhibits neuronal migration and axon growth in the developing mouse cerebral cortex
Source: publisher site journal article supplement (doi:10.18632/aging.103041), 2020-04-09
Supplement: Supplementary file [file aging-v12i7-103041-supplementary-material-SD2.pdf]

SUPPLEMENTARY FIGURES

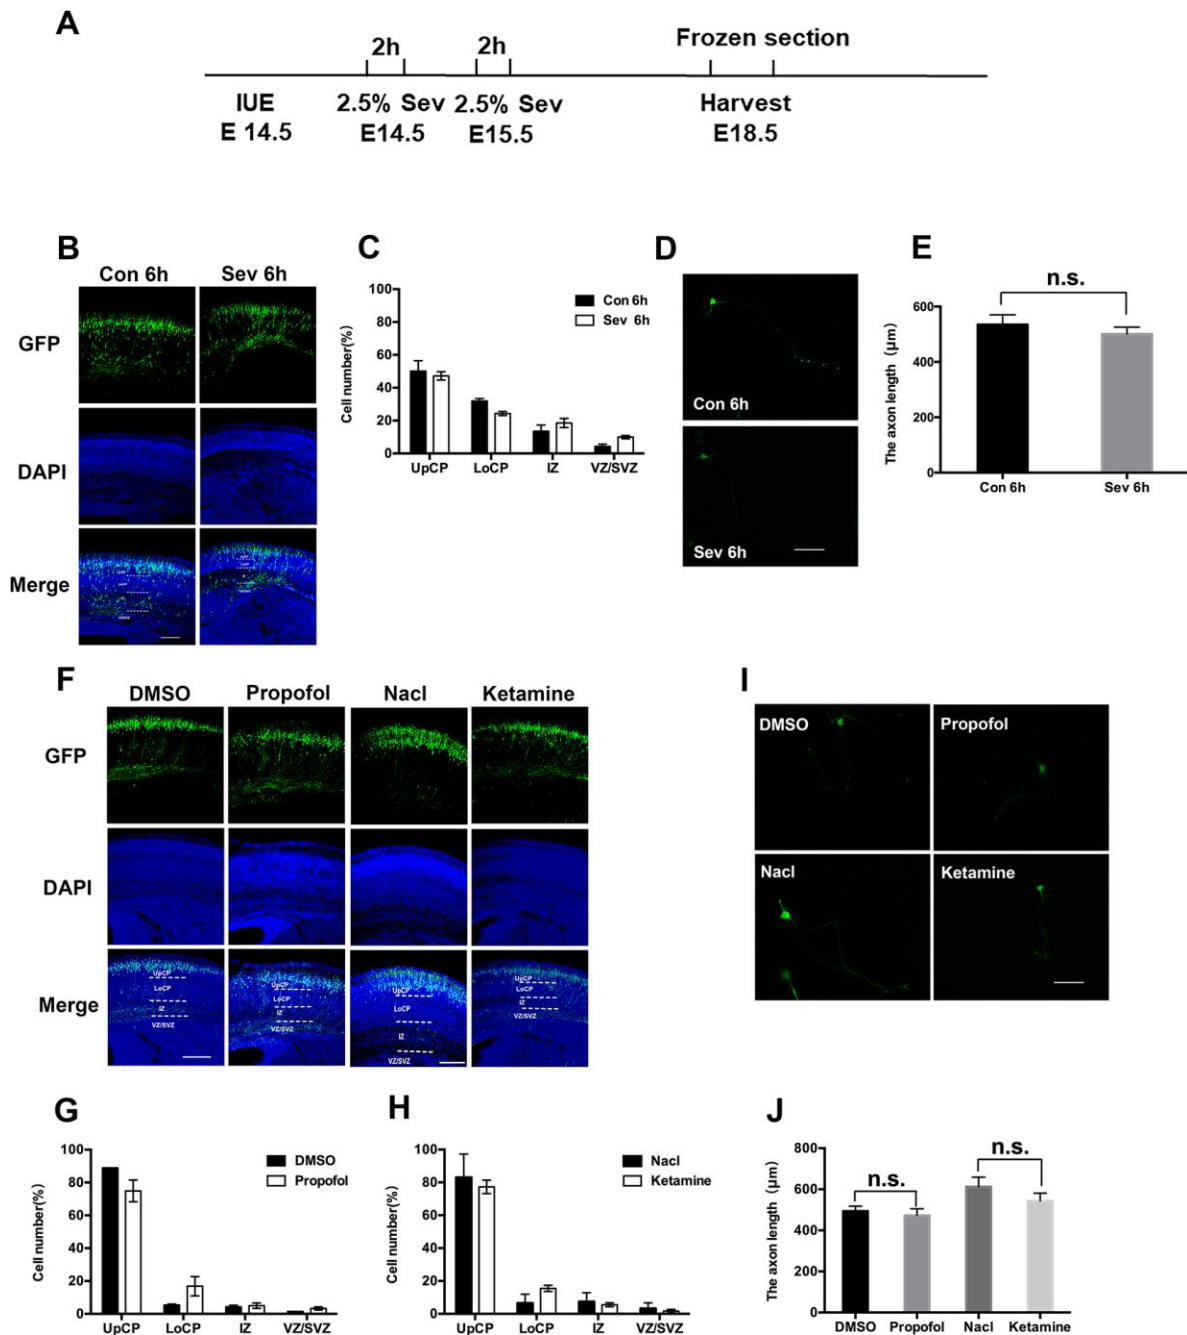

**Supplementary Figure 1. Neither single six-hour sevoflurane exposure nor dual two-hour intravenous anesthetics exposure had adverse effect on neuronal migration or axon length.** Control vector (Fugw-H1-GFP alone) was transfected in utero on E14.5 pregnant mice in different groups. Representative coronal sections of mouse brains revealed migration of transfected cells. (A) Flowchart of the IUE experiment. (B) Single six-hour sevoflurane exposure did not affect neuronal migration. All sections were counterstained with DAPI (blue) nuclear counterstain. (C) Quantification of GFP+ cells in different positions. The GFP+ cells in the UpCP, LoCP, IZ, and VZ/SVZ were counted, and the ratio of GFP+ cells was analyzed statistically using unpaired t-tests. Scale bars=200 µm. (D) Single six-hour sevoflurane exposure did not affect axon length of neurons in primary cultured mouse cortical neurons as well. (E) The statistical results for the axon length between the two groups. Scale bars = 100 µm. (F) Dual two-hour intravenous anesthetics exposure had no adverse effect on neuronal migration. (G, H) Quantification of GFP+ cells in different positions. (I) Dual two-hour intravenous anesthetics exposure did not affect axon length of neurons in primary cultured mouse cortical neurons. (J) The statistical results for the axon length between the two groups. \* $P < 0.05$ , \*\* $P < 0.01$ , \*\*\* $P < 0.001$ .

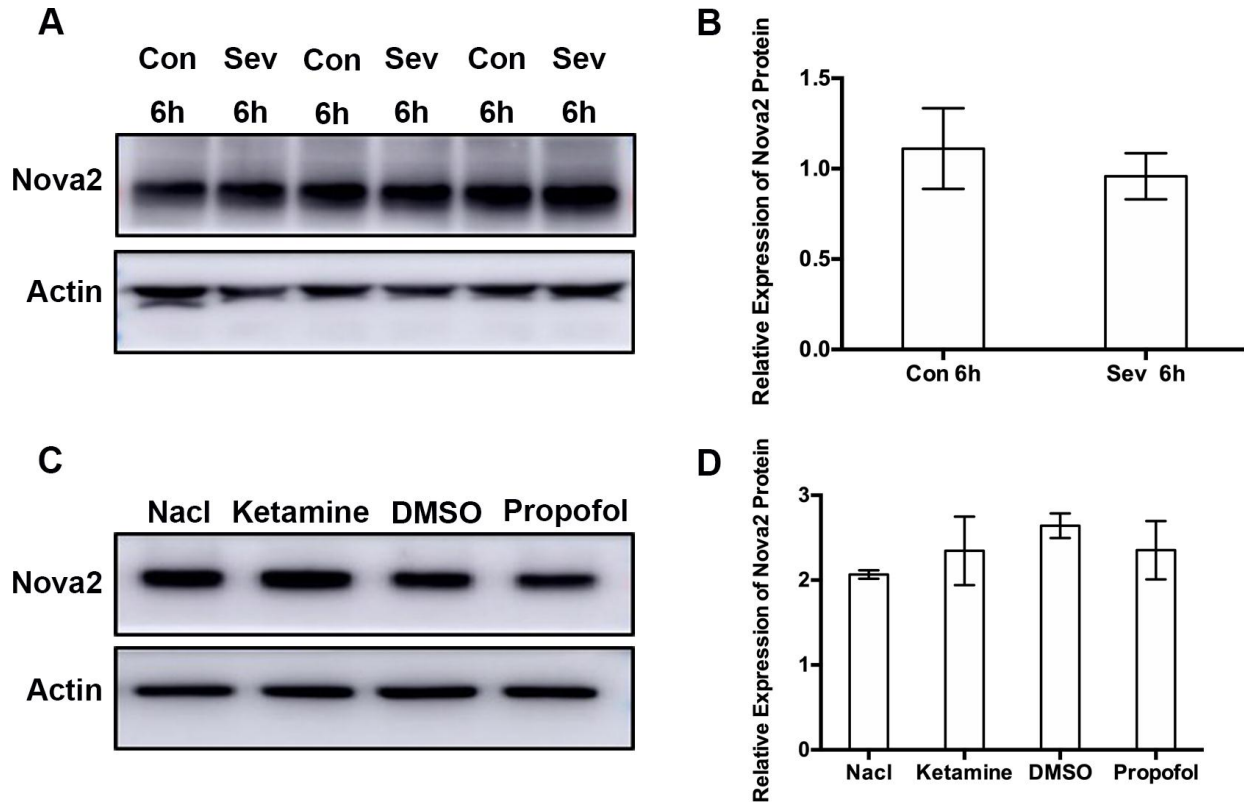

**Supplementary Figure 2. Neither single long-term sevoflurane exposure nor dual intravenous anesthetics exposure affected Nova2 protein expressions in the developing mouse brain.** (A) Western blot analysis demonstrated that single long-term sevoflurane exposure did not affect Nova2 expression in the cortical tissues of offspring mice. (B) Quantification of the protein expressions of Nova2 relative to Actin. (C) Western blot analysis demonstrated that dual intravenous anesthetics exposure also did not affect Nova2 expression in the cortical tissues of offspring mice. (D) Quantification of the protein expressions of Nova2 relative to Actin. \* $P < 0.05$ , \*\* $P < 0.01$ , \*\*\* $P < 0.001$ .

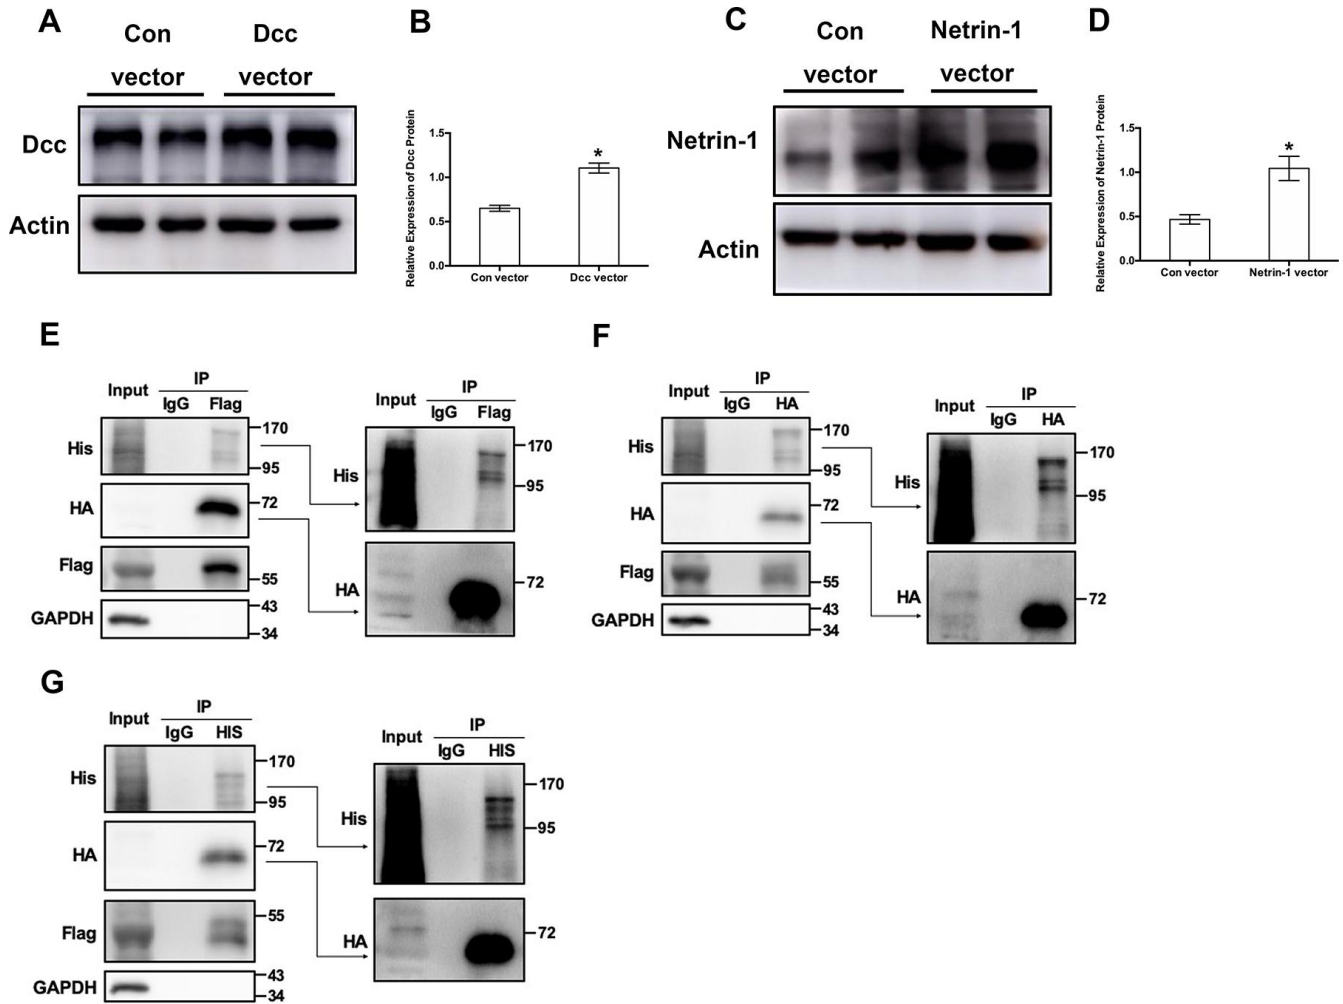

**Supplementary Figure 3. Nova2 interacts with Netrin-1/Dcc in the in the cortical tissues of offspring mice.** The brain tissues protein Lysate co-transfected with Flag-tagged Nova2 and HA-tagged Netrin-1/His-tagged Dcc were subjected to IP. **(A)** Dcc vector significantly increased the Dcc expression. **(B)** Quantification of the protein expressions of Dcc relative to Actin. **(C)** Netrin-1 vector significantly increased the Netrin-1 expression. **(D)** Quantification of the protein expressions of Netrin-1 relative to Actin. **(E)** IP assay used antibody against Flag. Western blotting using His and HA antibodies showed that Netrin-1/Dcc existed in the complex. **(F)** IP assay used antibody against HA. Western blotting using His and Flag antibodies showed that Nova2/Dcc existed in the complex. **(G)** IP assay used antibody against His. Western blotting using HA and Flag antibodies showed that Nova2/Netrin-1 existed in the complex. IgG was used as a nonspecific control. An input protein (5%) was used as the control in the transfected brain tissues lysates GAPDH was used as a loading control. \* $P < 0.05$ , \*\* $P < 0.01$ , \*\*\* $P < 0.001$ .
